# Supplementary material
Source: PubMed Central journal article supplement (PMC6020689)
Supplement: NIHMS976718-supplement-SI.pdf [file NIHMS976718-supplement-SI.pdf]

## **Supporting Information for:**

# **Traveling two diverging roads, cytochrome-P450 catalyzed demethylation and $\gamma$ -lactone formation in bacterial gibberellin biosynthesis**

Raimund Nagel and Reuben J. Peters\*

Roy J. Carver Department of Biochemistry, Biophysics and Molecular Biology, Iowa State University, Ames, IA, 50011, USA. \*E-mail: rjpeters@iastate.edu

## **Materials and Methods**

### ***Cloning of EtCYP112 and EtFdR***

*EtCYP112* was amplified from genomic DNA of *E. tracheiphila* with Q5 Hot Start High-Fidelity DNA polymerase (NEB), using the primers given in Table S2. The forward primer was designed to add an alanine, six histidines, and a glycine after the initial methionine to the N-terminus for purification of the protein. The reverse primer included a stop codon at the 3'-end so that the His-Tag of pET101 (Invitrogen) is omitted after cloning the PCR product into the vector according to the manual. Clones were verified by full-gene sequencing. The ferredoxin reductase of *E. tracheiphila* (*EtFdR*) was amplified with Q5 Hot Start High-Fidelity DNA polymerase, using the primers given in Table S2, and the amplified fragment was then cloned into pET100 (Invitrogen).

### ***Expression and Purification of EtCYP112 and EtFdR***

*EtCYP112* or *EtFdR* were transformed into *E. coli* BL21\* (Invitrogen) for expression. The starter culture of 50 ml liquid NZY medium (10 g/L NaCl, 10 g/L casein, 5 g/L yeast extract, 1 g/L MgSO<sub>4</sub> (anhydrous), pH 7.0) with 50  $\mu$ g/mL carbenicillin was inoculated from 3 individual colonies and grown for 2 days at 18°C under constant shaking at 200 rpm. 25 mL were used to inoculate 1 L of NZY including 50  $\mu$ g/mL carbenicillin at 18°C and constant shaking at 200 rpm until an OD<sub>600</sub> of 0.8 was reached. At this point the culture was induced with 1 mM IPTG and, for cultures expressing *EtCYP112*, 1 mM aminolevulinic acid, 1 mM riboflavin and 0.1 mM FeCl<sub>3</sub> were added. After 36 hours, the cells were harvested by centrifugation at 5000 x g for 20 min. The *EtCYP112* cell pellet was re-suspended in 10 mL buffer 1 (25 mM 3-(N-morpholino)-2-hydroxypropanesulfonic acid (MOPSO), pH 7.2, 10% (v/v) glycerol), while the *EtFdR* cell pellet was re-suspended in 10 mL of buffer 2 (50 mM phosphate, pH 7.5, 10% glycerol). Both cell suspensions were then homogenized using an EmulsiFlex C-3 (Avestin, Canada). The lysate was centrifuged at 17,000 x g for 30 min. The cleared lysate was then added to 1 mL of Ni-NTA Agarose (Qiagen), buffer 1 or 2 with 1 M imidazole was added to a final concentration of 20 mM imidazole and

incubated with gentle shaking at 4°C for 1 h. The column was washed with 5 mL buffer 1 or 2 containing 20 mM imidazole and 60 mM imidazole each, before being eluted with buffer 1 or 2 with 250 mM imidazole. The protein was then transferred to dialysis tubing with a molecular weight cutoff of 15 kDa and dialyzed 3 times against buffer 3 (10 mM MOPSO, pH 7.2, 5% (v/v) glycerol) in the case of *EtCYP112*, or buffer 4 (25 mM phosphate, pH 7.5, 10% glycerol) in the case of *EtFdR*. The resulting enzymes were either used fresh or stored at -80°C after flash freezing by brief immersion in liquid nitrogen of 0.5 mL aliquots in 1.5 mL Eppendorf tubes.

### ***Enzyme assays***

For activity assays 0.01 ml each of purified *EtCYP112*, spinach ferredoxin (Sigma-Aldrich), and *EtFdR* (all at 1 mg/mL in buffer 1) were diluted with 1.5 mL of buffer 3 in 4 mL clear glass vials, and 20 µM of the specified substrate and 60 µM NADPH were added. The vial was sealed with a Teflon septum and incubated for 12 h at 25 °C. For <sup>18</sup>O<sub>2</sub> labeling experiments clear 4 mL glass vials with a Teflon seal were flushed with nitrogen for 5 min then 0.05 mL each of purified *EtCYP112*, spinach ferredoxin (Sigma-Aldrich), and *EtFdR* (all at 1 mg/mL in buffer 1), and 1.7 mL degassed buffer 1 were added using a syringe. <sup>18</sup>O<sub>2</sub> (Sigma-Aldrich, 97% labeled; max loaded pressure less than 2.4 bar) was added from the gas cylinder via a needle puncturing the septum until the pressure equilibrated between the tank and the vial. The reaction was started with the addition of substrates to a final concentration of 40 µM. NADPH was added in 3- or 10- fold excess relative to substrate in assays with GA<sub>12</sub>, with 2-fold excess in assays with GA<sub>15</sub> and at equal concentrations in assays with GA<sub>24</sub>. The assay was incubated at 25 °C for 16 h. When H<sub>2</sub>O<sub>2</sub> or *tert*-butyl hydroperoxide was used as the reduction agent and oxygen donor, no NADPH, *EtFdR*, or Fd were added, instead H<sub>2</sub>O<sub>2</sub> was added to a final concentration of 60 µM or *tert*-butyl hydroperoxide to a final concentration of 100 µM. The products of all assays were extracted three times with 2 ml ethyl acetate, the pooled extract evaporated to dryness, and the residue methylated with diazomethane and, after re-evaporation, dissolved in hexane for GC-MS analysis as described in (4). Assays from <sup>18</sup>O<sub>2</sub> labeling experiments were analyzed with an Agilent 6540 GC coupled to a Waters GCT Premier mass spectrometer, separation was achieved on a DB-5MS column (30 m, 250 µm, 0.25 µm) with the same gradient as described in (4) . When GA<sub>12</sub>-aldehyde was used as a substrate, two-thirds of the extracted products were separated and, after evaporation, dissolved in 300 µL of methanol:DMSO (1:1, v/v) without methylation. This extract was added to a culture expressing the SDR from the GA operon in *E. tracheiphila* and, after incubation for 3 days, extracted and analyzed with a 3900 Saturn GC coupled to a 2100T ion trap mass spectrometer (Varian, Palo Alto, CA, USA) as described (4). GC-MS spectra of GA<sub>9</sub> differed in the abundance of higher molecular weight fragments between the GC-MS ion trap and GC-MS time of flight.

### *C*<sup>18</sup>O<sub>2</sub> measurement by GC-MS

The reaction was carried out as described under enzyme assays with NADPH added in 10-fold excess, and the assay incubated for 4 h at 25°C. 200 μL of the gas phase were manually injected into the inlet of a GC-MS, 3900 Saturn GC coupled to a 2100T ion trap mass spectrometer (Varian, Palo Alto, CA, USA), using a gas-tight syringe. A HP-PLOT/Q column (30 m x 0.32 mm x 20 μm) (Agilent) was used for separation with a constant He flow of 4 mL min<sup>-1</sup>, the inlet temperature was set at 250 °C and the oven temperature was initially kept at 50 °C for 2 min, the temperature was then increased by 90 °C/min to 240 °C, where it was held for 1 min.

### Supplemental Tables

**Table 1:** Incorporation of <sup>18</sup>O<sub>2</sub> by *Et*CYP112 into various substrates.

| Analyte           |                 | % abundance of <sup>18</sup> O label |                  |                              |                            |                  |                    |                    |
|-------------------|-----------------|--------------------------------------|------------------|------------------------------|----------------------------|------------------|--------------------|--------------------|
|                   |                 | Substrates                           |                  |                              |                            |                  |                    |                    |
|                   |                 | GA <sub>12</sub>                     | GA <sub>12</sub> | GA <sub>15</sub><br>(closed) | GA <sub>15</sub><br>(open) | GA <sub>24</sub> | MeGA <sub>12</sub> | MeGA <sub>15</sub> |
| [M <sup>+</sup> ] | excess<br>NADPH | limited<br>NADPH                     | limited<br>NADPH | limited<br>NADPH             | limited<br>NADPH           | limited<br>NADPH | limited<br>NADPH   |                    |
| GA12              | 360             |                                      |                  |                              |                            |                  |                    |                    |
|                   | 0               | n.d.                                 | 99 ± 0.5         |                              |                            |                  | 99 ± 0.2           |                    |
|                   | +2              | n.d.                                 | 1 ± 0.2          |                              |                            |                  | 1 ± 0.1            |                    |
| GA15              | 344             |                                      |                  |                              |                            |                  |                    |                    |
|                   | 0               | n.d.                                 | 3 ± 1            | 98 ± 1                       | 98 ± 1.5                   |                  | 1 ± 0.5            | 98 ± 1             |
|                   | +2              | n.d.                                 | 96 ± 2           | 2 ± 1                        | 2 ± 1                      |                  | 98 ± 1             | 2 ± 0.6            |
|                   | +4              | n.d.                                 | 1 ± 0.4          |                              |                            |                  | 1 ± 0.1            |                    |
| GA24              | 374             |                                      |                  |                              |                            |                  |                    |                    |
|                   | 0               | n.d.                                 | 3 ± 1            | 3 ± 0.5                      | 32 ± 1.5                   | 99 ± 0.1         | 0                  | 2 ± 0.3            |
|                   | +2              | n.d.                                 | 60 ± 0.4         | 95 ± 1                       | 67 ± 1.5                   | 1 ± 0.1          | 1 ± 0.1            | 96 ± 1             |
|                   | +4              | n.d.                                 | 37 ± 0.5         | 2 ± 1                        | 1 ± 0.4                    |                  | 99 ± 0.6           | 2 ± 0.4            |
| GA9               | 330             |                                      |                  |                              |                            |                  |                    |                    |
|                   | 0               | 56 ± 1                               | 86 ± 0.5         | 98 ± 0.3                     | 99 ± 0.5                   | 98 ± 1.5         | 1 ± 0.2            | 99 ± 0.1           |
|                   | +2              | 44 ± 1                               | 14 ± 0.3         | 2 ± 0.2                      | 1 ± 0.3                    | 2 ± 1            | 99 ± 0.4           | 1 ± 0.1            |

n.d., not detectable

**Table S2:** Primers used in cloning.

| Primer name                           | Primer Sequence                                    |
|---------------------------------------|----------------------------------------------------|
| <i>E. tracheiphila</i> FdR forward    | CACCATGGCCGAATGGATTAATGCAAGCATC                    |
| <i>E. tracheiphila</i> FdR reverse    | TTACCAATAGTGTTTCGCTGGTCATATGCC                     |
| <i>E. tracheiphila</i> CYP112 forward | CACCATGGCGCATCATCATCATCATGGTTTTGAAAATAACCCAGTGCAGC |
| <i>E. tracheiphila</i> CYP112 reverse | TTACAGATACACGGGAAACTTCTCGAATCCGC                   |

## Supplemental Figures

Figure S1

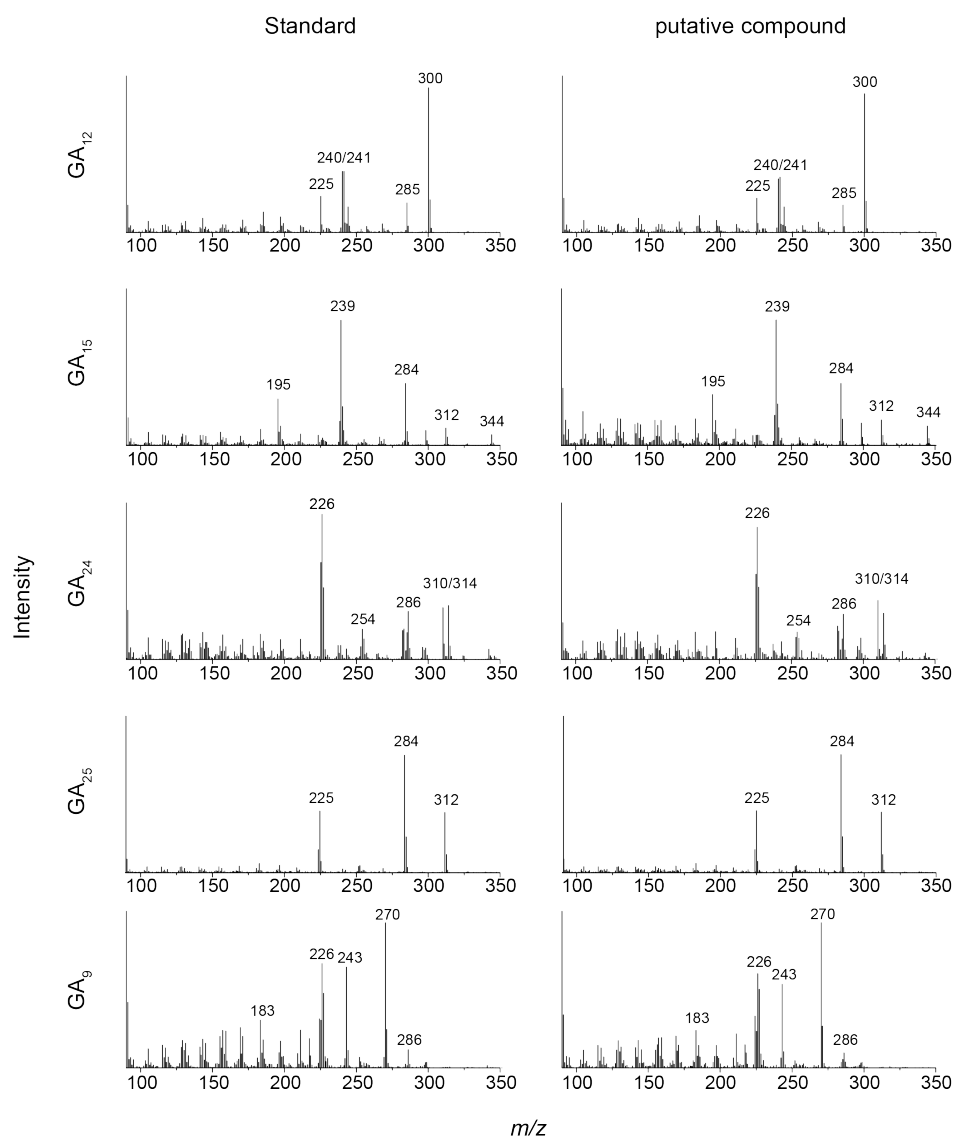

**Figure S1:** Comparison of MS-Spectra of *Et*CYP112 gibberellin products with authentic standards. MS spectra of authentic standards and compounds produced by *Et*CYP112 in *in vitro* enzyme assays.

Figure S2

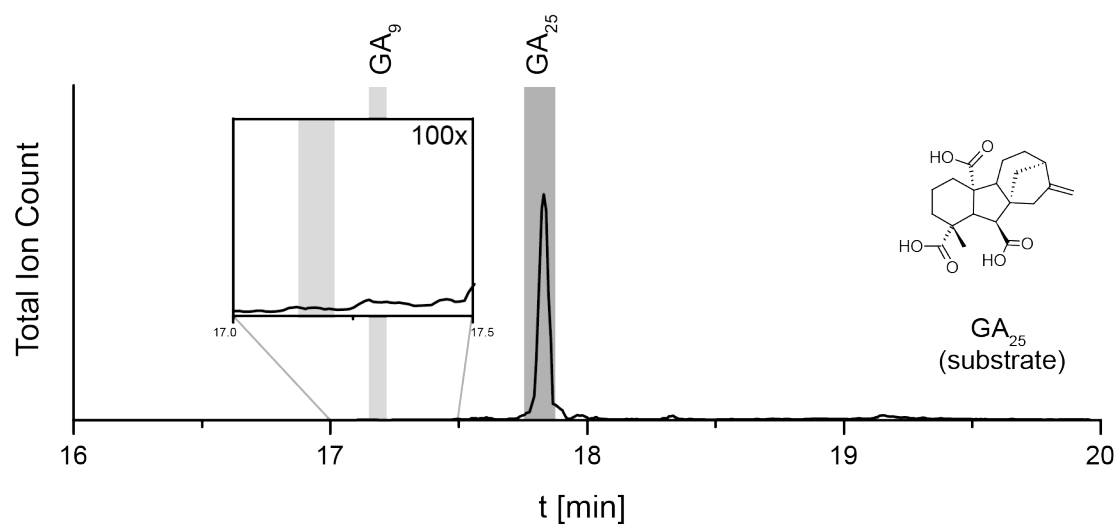

**Figure S2:** Enzyme activity of *EtCYP112* with GA<sub>25</sub>. GC-MS-chromatograms of *in vitro* assays with *EtCYP112* and GA<sub>25</sub>, the inset is an enlargements of the y-axis of the chromatogram by 100 fold.

Figure S3

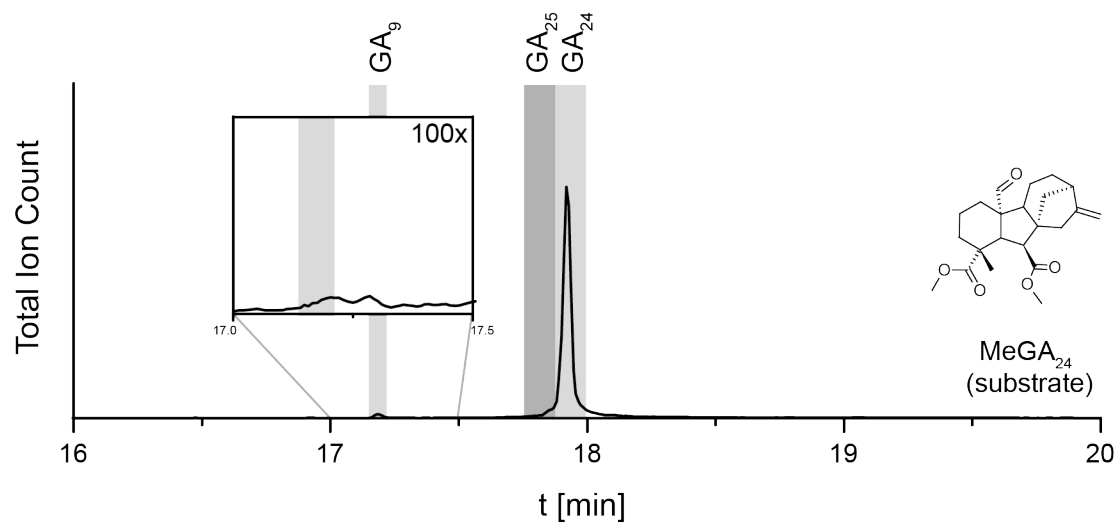

**Figure S3:** Enzyme activity of *EtCYP112* with MeGA<sub>24</sub>. GC-MS-chromatograms of *in vitro* assays with *EtCYP112* and MeGA<sub>24</sub>, the inset is an enlargement of the y-axis of the chromatogram by 100-fold.

Figure S4

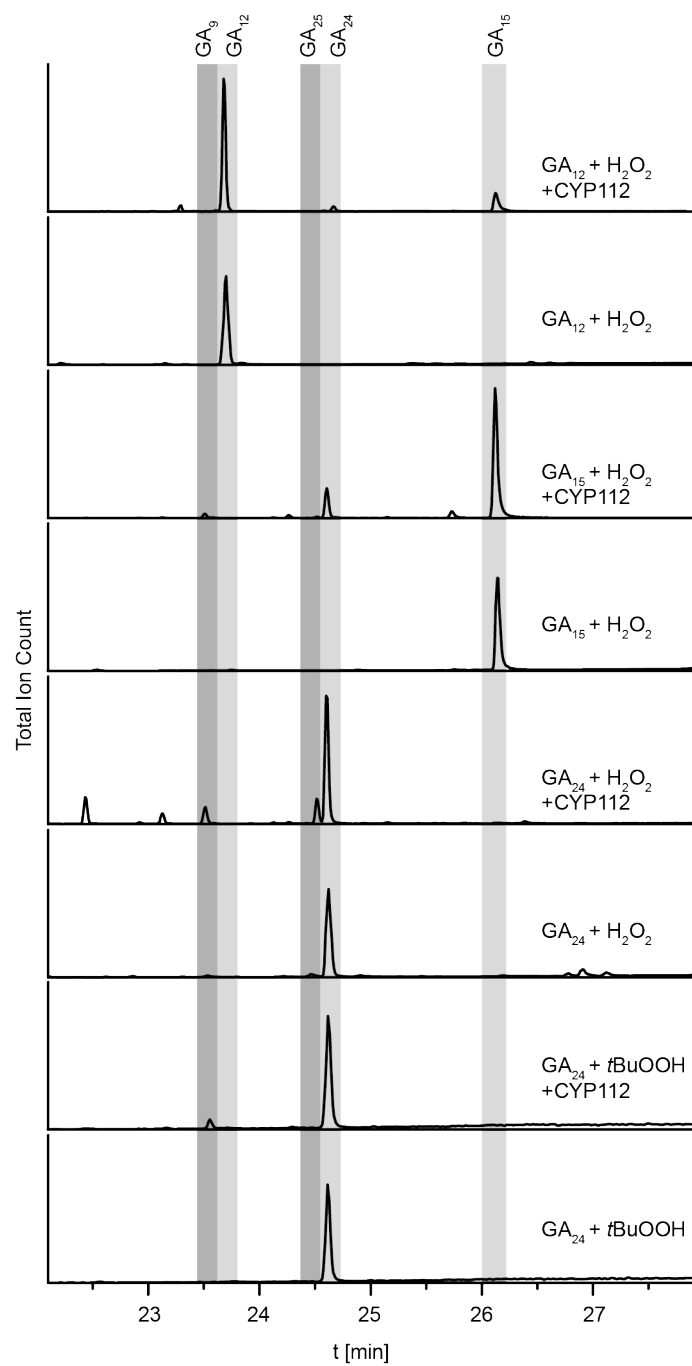

**Figure S4:** Enzyme activity of *Et*CYP112 employing the H<sub>2</sub>O<sub>2</sub>-shunt. GC-MS-chromatograms of in vitro assays with *Et*CYP112 and GA<sub>12</sub>, GA<sub>15</sub> or GA<sub>24</sub> or non-enzyme controls with H<sub>2</sub>O<sub>2</sub> or *tert*-butyl hydrogenperoxide (*t*BuOOH) for GA<sub>24</sub> only, as the oxygen and electron donor, instead of O<sub>2</sub> and electrons supplied by a ferredoxin.

## Supplemental Schemes

### Scheme S1

GA<sub>12</sub> as substrate

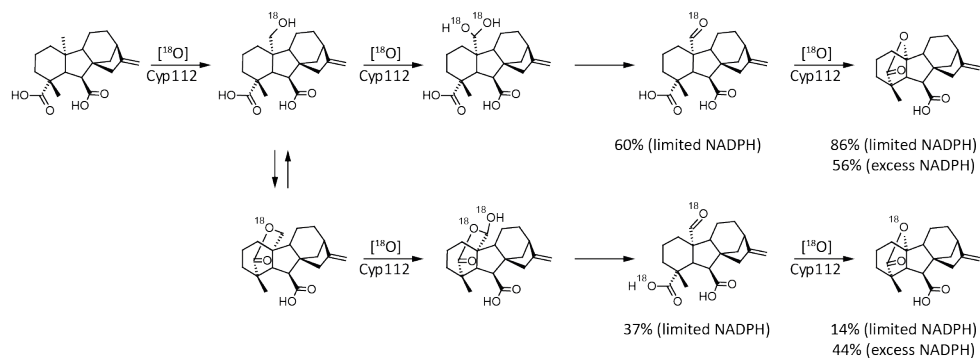

GA<sub>15</sub> (closed  $\delta$ -lactone) as substrate

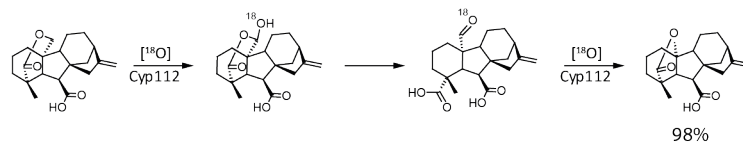

GA<sub>24</sub> as substrate

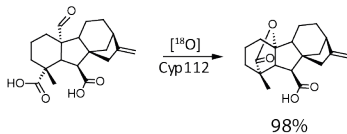

GA<sub>12</sub> methyl ester as substrate

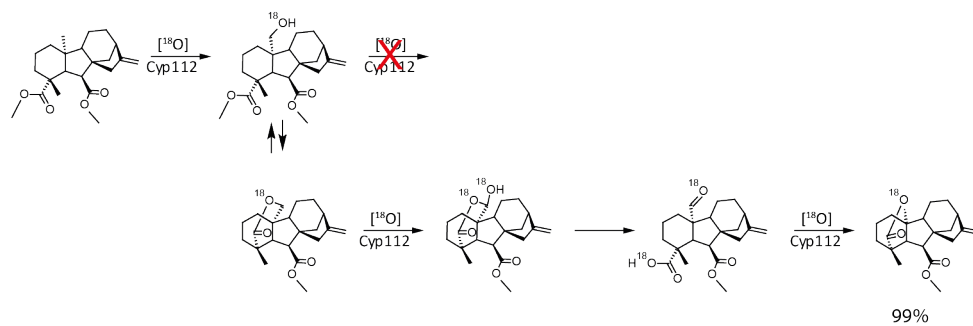

GA<sub>15</sub> methyl ester as substrate

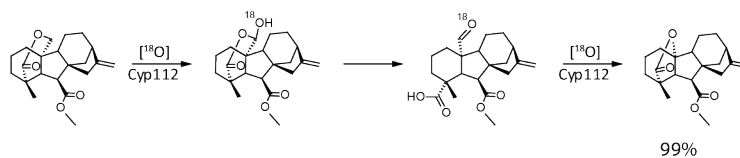

**Scheme S1:** Position of <sup>18</sup>O labels. Schemes depicting the position of the <sup>18</sup>O label, from GA<sub>12</sub>, GA<sub>15</sub>, GA<sub>24</sub>, MeGA<sub>12</sub> and MeGA<sub>15</sub> into GA<sub>9</sub> or MeGA<sub>9</sub>.

Scheme S2

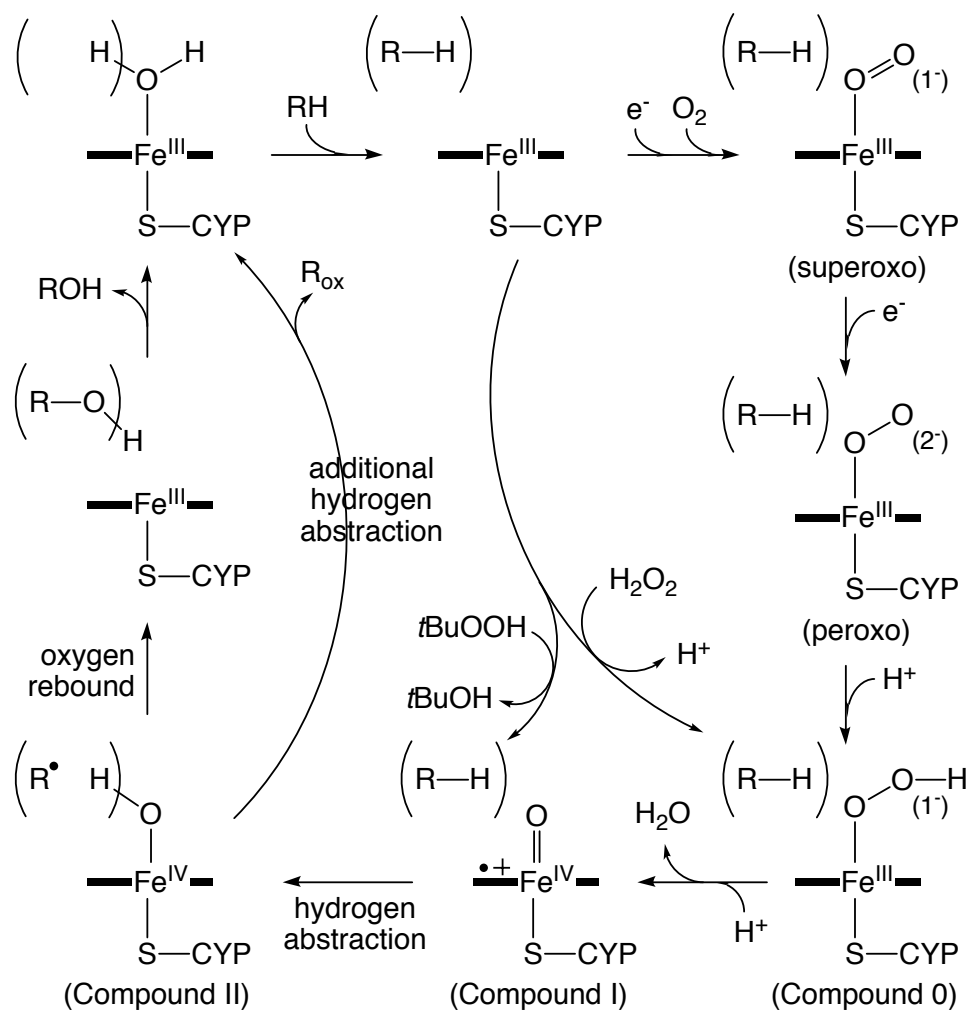

**Scheme S2:** CYP reaction cycle showing active complexes, use of hydrogen peroxide (H<sub>2</sub>O<sub>2</sub>) or *tert*-butyl hydroperoxide (*t*BuOOH), and alternative reactivity for Compound II discussed in the text (largely adapted from Krest et al, 2013).



Scheme S3

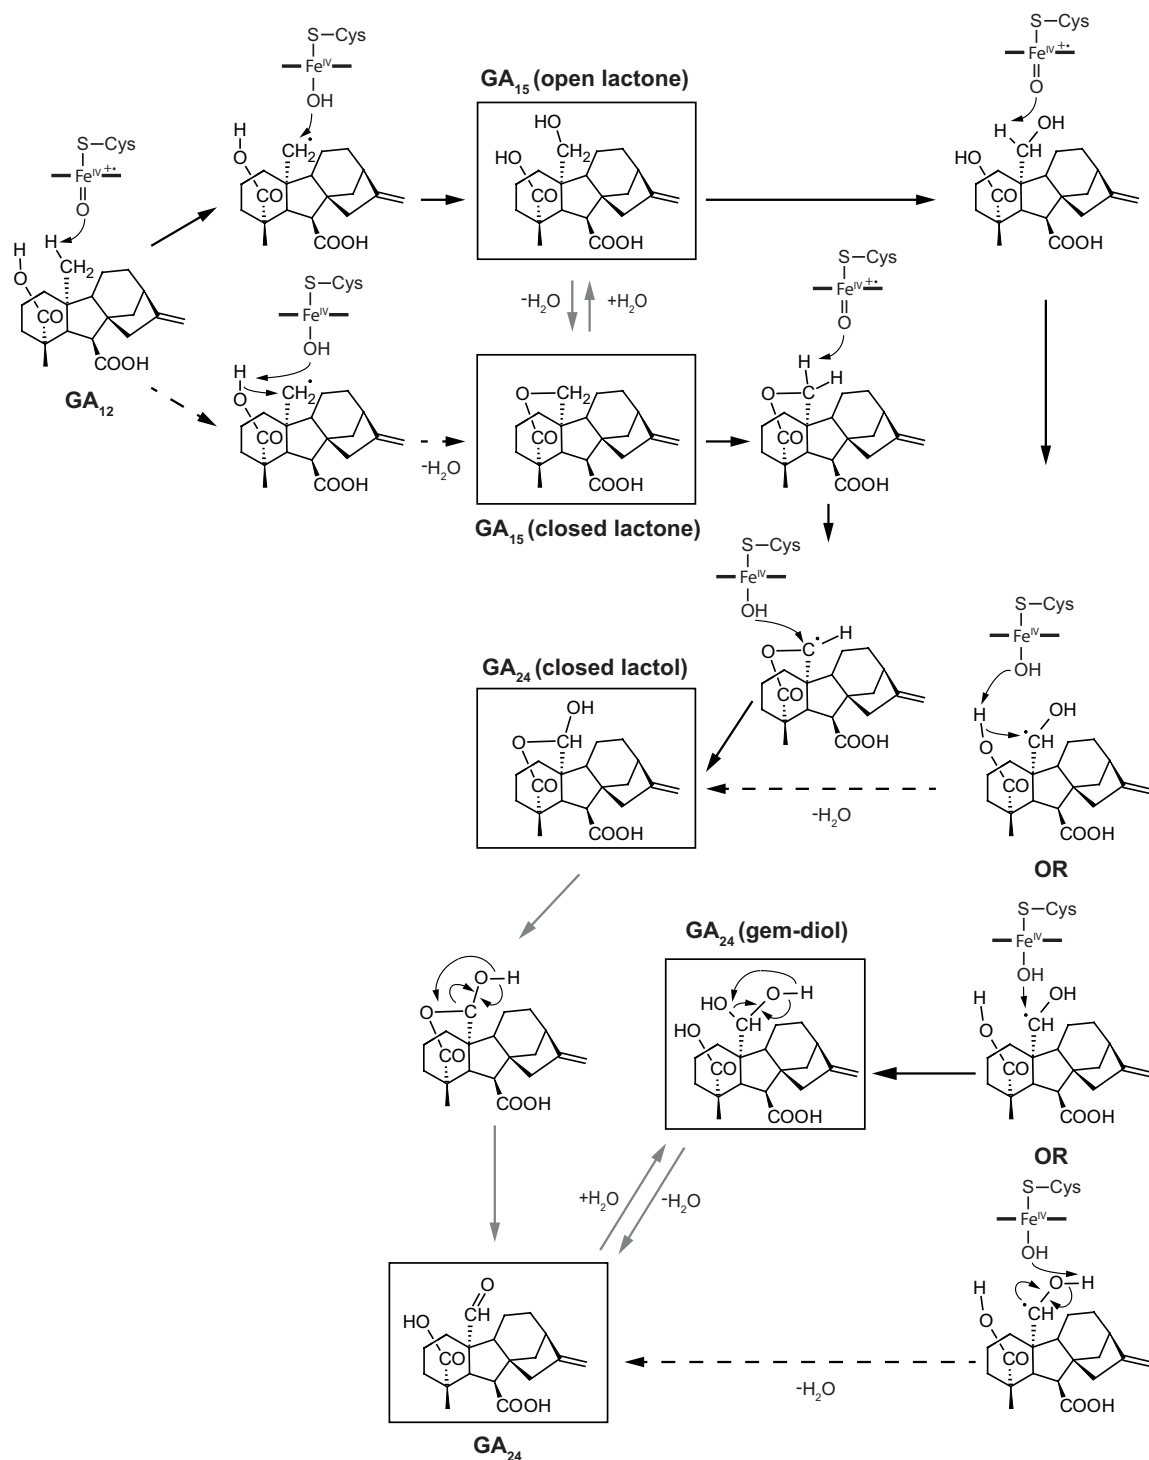

**Scheme S3:** Proposed reaction mechanisms from GA<sub>12</sub> to GA<sub>24</sub>. Potential reactions mechanisms modified after MacMillan (1997) for the transformation of GA<sub>12</sub> to GA<sub>24</sub>. Solid arrows in black are enzymatic reactions catalyzed by *EiCYP112*, solid grey arrows are non-enzymatic reactions and dashed black arrows are reactions not catalyzed by *EiCYP112*.
